# Supplementary material for: BMAL1 coordinates energy metabolism and differentiation of pluripotent stem cells
Source: Life Sci Alliance. 2020 Apr 13;3(5):e201900534. doi: 10.26508/lsa.201900534 (PMC7156282; doi:10.26508/lsa.201900534)
Supplement: Supplementary file 1 [file LSA-2019-00534_SdataF1.xlsx]

## Sheet: Fig1A
Relative to βTUBULIN and ESCs	MEF_1	ESC_1	MEF_2	ESC_2	MEF_3	ESC_3
BMAL1	0.317013	1.15624	0.36677	1.08314	0.367666	0.760621
NANOG	0	1.18262	0	1.07192	0	0.74546
POU5F1 (OCT4)	0	1.09491	0	1.00206	0	0.903035
βTUBULIN	1	1	1	1	1	1
Average	MEFs	ESCs		SD	MEFs	ESCs
BMAL1	0.350483	1		BMAL1	0.0289891	0.210506
NANOG	0	1		NANOG	0	0.227281
POU5F1	0	1		POU5F1	0	0.095952

## Sheet: Fig1B
Note: Values are relative to ACTB and shLuci
Rep1 (Fig1B)	Area				Rep2	Area				Rep3	Area
	BMAL1	POU5F1	ACTB		n=2	BMAL1	POU5F1	ACTB		n=2	BMAL1	POU5F1	ACTB
shLuci	1	1	1		shLuci	1	1	1		shLuci	1	1	1
shBmal1 #1	0	1.2103	1		shBmal1 #1	0.493133	1.37882	1		shBmal1 #1	0.0446277	0.919763	1
shBmal1 #2	0.241973	0.57325	1		shBmal1 #2	0.25528	1.58771	1		shBmal1 #2	0.395822	0.854901	1
				BMAL1			POU5F1
				shLuci	shBmal1 #1	shBmal1 #2	shLuci	shBmal1 #1	shBmal1 #2
			AVE	1	0.179254	0.297692	1	1.16963	1.00529
			SD	0	0.272742	0.0852434	0	0.232216	0.523684

## Sheet: Fig1F
		LIF +			LIF -
	% Colonies	undif.	patially	dif.	undif.	patially	dif.
	shLuci_1	75.6098	21.9512	2.43902	2.38095	45.2381	52.381
	shLuci_2	69.6429	21.4286	8.92857	6.52174	36.9565	56.5217
	shLuci_3	58.6207	29.3103	12.069	5.88235	47.0588	47.0588
	shBmal1#1_1	73.5294	20.5882	5.88235	3.7037	37.037	59.2593
	shBmal1#1_2	72.7273	18.1818	9.09091	3.22581	45.1613	51.6129
	shBmal1#1_3	70.5882	20.5882	8.82353	3.57143	46.4286	50
	shBmal1#2_1	72.2222	21.1111	6.66667	9.375	44.7917	45.8333
	shBmal1#2_2	69.5652	22.8261	7.6087	1	47	52
	shBmal1#2_3	68.8889	23.3333	7.77778	1.92308	43.2692	54.8077
