# Supplementary material for: BMAL1 coordinates energy metabolism and differentiation of pluripotent stem cells
Source: Life Sci Alliance. 2020 Apr 13;3(5):e201900534. doi: 10.26508/lsa.201900534 (PMC7156282; doi:10.26508/lsa.201900534)
Supplement: Supplementary file 2 [file LSA-2019-00534_SdataF2.xlsx]

## Sheet: Fig2B
Note: Values are relative to TUBULIN and WT cells
		WT_1	KO_1	WT_2	KO_2	WT_3	KO_3
	BMAL1	0.949932	0	1.2142	0	0.835872	0
	NANOG	0.836961	1.04542	1.14102	0.982412	1.02201	0.742205
	POU5F1	1.04506	1.41163	1.05958	0.96474	0.895367	0.86834
	βTUBULIN	1	1	1	1	1	1
	Average	WT	KO		SD	WT	KO
	BMAL1	1	0		BMAL1	0.194068	0
	NANOG	1	0.923347		NANOG	0.153223	0.160006
	POU5F1	1	1.08157		POU5F1	0.0909048	0.289873

## Sheet: Fig2E
	Number of colonies
	Bmal1 WT+LIF	Bmal1 KO+LIF	Bmal1 WT-LIF	Bmal1 KO-LIF
#1	503	484	245	292
#2	557	462	311	298
#3	444	371	332	317

## Sheet: Fig2F
		LIF+			LIF-
	% Colonies	Undiff.	Partially	Diff.	Undiff.	Partially	Diff.
	WT#1	78.1312	16.3022	5.5666	0	31.0204	68.9796
	WT#2	73.6086	18.6715	7.71993	0.321543	32.1543	67.5241
	WT#3	71.6216	22.0721	6.30631	0.301205	39.4578	60.241
	Bmal1 KO#1	57.2314	28.719	14.0496	0.684932	59.589	39.726
	Bmal1 KO#2	64.0693	23.8095	12.1212	0.671141	62.0805	37.2483
	Bmal1 KO#3	57.4124	30.4582	12.1294	1.26183	71.6088	27.1293
