# Supplementary material for: BMAL1 coordinates energy metabolism and differentiation of pluripotent stem cells
Source: Life Sci Alliance. 2020 Apr 13;3(5):e201900534. doi: 10.26508/lsa.201900534 (PMC7156282; doi:10.26508/lsa.201900534)
Supplement: Supplementary file 4 [file LSA-2019-00534_SdataF4.xlsx]

## Sheet: Fig4A
	Teratoma size (cm)
	Bmal1 WT	Bmal1 KO
#1	1	2.5
#2	1.5	2.5
#3	1.5	1.5
#4	2	1
#5	2	1.5
#6	2	1.8
#7	2	1.5
#8	1	2

## Sheet: Fig4D
RNA expression rel to d0 (log2)
Bmal1	Nanog	Pax3	Gata6	Mixl1
-2.5452	-2.03478	7.12633	6.25787	8.06743
-3.08656	-2.45444	6.57472	7.15965	9.67194

## Sheet: Fig4E
	EB diameter (µm)
	WT	Bmal1 KO
#1	757.945	254.778
#2	309.123	239.633
#3	392.401	198.385
#4	412.249	283.637
#5	296.015	413.946
#6	214.082	290.097
#7	121.655	269.811
#8	197.103	358.654
#9	111.507	168.829
#10	76.571	82.473
#11	155.795	74.38
#12	248.032	81.104
#13	176.897	523.116
#14	128.617	294.38
#15	149.387	316.304
#16	169.967	272.816
#17	174.264	416.722
#18	210.418	206.318
#19	268.053	198.573
#20	190.485	147.326
#21	80.111	190.932
#22	286.803	87.256
#23	280.473	82.677
#24	233.337	60.809
#25	149.815	289.751
#26	103.185	194.287
#27	254.698	194.447
#28	313.58	342.812
#29	189.563	275.126
#30	307.017	102.45
#31	196.417	239.496
#32	64.553	105.164
#33	91.613	297.74
#34	244.931	96.747
#35	195.323	72.308
#36	244.408	385.278
#37	128.236	92.27
#38	105.367	174.794
#39	71.554	134.772
#40	121.165	228.44
#41	196.331	442.285
#42	96.009	243.384
#43	113.333	65.115
#44	133.932	206.89
#45	279.66	223.507
#46	188.378	331.569
#47	162.825	100.178
#48	170.604	81.464
#49	235.453	277.826
#50	156.518	395.247
#51	119.294	197.428
#52	92.039	186.838
#53	143.914	246.98
#54	83.053	354.516
#55	68.986	341.326
#56	86.183	269.257
#57	36.612	369.167
#58	98.999	127.562
#59	276.923	118.697
#60	224.036	209.129
#61	246.757	278.114
#62	139.076	345.356
#63	90.676	426.75
#64	189.901	222.023
#65	72.16	286.642
#66	208.619	241.138
#67	301.996	310.3
#68	323.879	394.676
#69	155.566	344.661
#70	149.262	165.559
#71	299.647	165.016
#72	241.995	168.892
#73	178.054	210.856
#74	116.061	112.791
#75	179.382	324.77
#76	257.596	78.031
#77	213.075	78.429
#78	108.288	68.832
#79	52.932	63.344
#80	263.076	72.111
#81		391.991
#82		370.906
#83		254.834
#84		252.578
#85		221.61
#86		217.828
#87		277.593
#88		435.908
#89		185.583
#90		295.269
#91		214.869
#92		379.326
#93		349.092
#94		338.984
#95		428.102
#96		190.671
#97		298.22
#98		279.078
#99		270.325
#100		267.642
#101		371.656
#102		125.673
#103		334.287
#104		144.006
#105		202.302
#106		186.686
#107		306.275
#108		209.04
#109		438.344

## Sheet: Fig4F
	Bmal1 WT		Bmal1 KO
	day0	day6	day0	day6
Nanog	1	0.571239	0.881402	0.287316
Otx2	0.337666	0.973453	0.178263	1
Sox1	0.153492	0.218009	0.824433	1
Pax3	0.264389	0.49534	0.45851	1
Nes	0.0836612	1	0.119826	0.834148
Cxcl12	0.038151	0.601833	0.0514957	1
Mixl1	0.00619521	1	0.0115546	0.0320119
Eomes	0.129609	1	0.0167817	0.0573396
T	0.00429001	1	0.00273251	0.0872369
Mest	0.0159939	0.176223	1	0.941362
Gata4	0.148531	1	0.141029	0.189203
Gata6	0.00673969	1	0.0113577	0.0484477
Sox17	0.0211198	1	0.0281556	0.0894307
