# Supplementary material for: BMAL1 coordinates energy metabolism and differentiation of pluripotent stem cells
Source: Life Sci Alliance. 2020 Apr 13;3(5):e201900534. doi: 10.26508/lsa.201900534 (PMC7156282; doi:10.26508/lsa.201900534)
Supplement: Supplementary file 5 [file LSA-2019-00534_SdataF5.xlsx]

## Sheet: Fig5B
RNA expression rel 0h (log2)
Bmal1	Nanog	Pax3	Gata6	Mixl1
-0.93881	-5.73653	1.29697	9.88993	3.84243
-1.13881	-4.27464	1.32743	9.91146	3.91169
-1.03881	-5.10756	1.51111	10.5851	3.86201

## Sheet: Fig5D
	% Gastruloid-like structures
# Experiment	WT	KO
#1	37.5	0
#2	50	12.5
#3	50	12.5
#4	62.5	0
#5	75	12.5
#6	50	0
#7	25	12.5
#8	37.5	12.5
#9	37.5	0
#10	25	12.5
#11	37.5	12.5
#12	25	0
#13	37.5	0
#14	25	12.5

## Sheet: Fig5E
	Size (a.u.)
	WT	Bmal1 KO
#1	361.275	541.491
#2	980.713	630.171
#3	1128.38	591.219
#4	809.521	792.451
#5	1102.5	621.426
#6	983.051	940.758
#7	1081.1	390.988
#8	752.81	577.104
#9	985.976	652.216
#10	786.441	682.54
#11	750.602	735.58
#12	1085.2	967.529
#13	867.561	704.442
#14	886.546	665.243
#15	824.543	791.23
#16	920.396	834.974
#17	873.621	658.173
#18	1033.37	625.824
#19	743.115	546.073
#20	834.926	886.337
#21	845.726	818.673
#22	868.879	627.61
#23	734.412	541.541
#24	1054.78	570.547
#25	936.06	648.844
#26	832.679	610.343
#27	819.716	583.929
#28	657.977	704.24
#29	910.132	612.546
#30	928.427	614.659
#31	976.159	617.659
#32	909.323	603.784
#33	919.147	608.863
#34	1032.9	545.907
#35	1307.76	605.432
#36	878.973	550.719
#37	1064.13	611.599
#38	861.546	546.606
#39	935.402	600.736
#40	862.088	593.862
#41	847.259	528.861
#42	1454.56	656.221
#43	824.123	584.931
#44	843.338	537.998
#45	910.727	585.632
#46	747.849	722.477
#47	964.068	575.083
#48	450.163	330.571

## Sheet: Fig5F
	Bmal1 WT		Bmal1 KO
	0h	120h	0h	120h
Nanog	1	0.0331422	0.706967	0.100669
Otx2	0.82825	0.66119	0.369351	1
Sox1	0.177204	0.0918888	1	0.107742
Pax3	0.129672	0.337881	0.226111	1
Nes	0.0847629	0.546704	0.104973	1
Cxcl12	0.0116469	1	0.00771235	0.144043
Mixl1	0.00296668	0.0436021	0.00316707	1
Eomes	0.349112	1	0.0367619	0.727406
T	2.47325e-05	0.0353285	0.00162201	1
Mest	0.0177882	0.0630015	1	0.839742
Gata4	0.137066	1	0.108678	0.580505
Gata6	0.000870071	1	0.00136973	0.174517
Sox17	0.620007	0.609673	1	0.258761

## Sheet: Fig5G
Hoxd1	24h	48h	72h	96h	120h		Hoxd3	24h	48h	72h	96h	120h
WT#1	0.00361379	0.0631718	0.251478	1.20166	0.883372		WT#1	0.00117107	0.000531723	0.000296196	0.902281	0.804769
WT#2	0.0136317	0.100947	0.208305	1.02534	1.06446		WT#2	0.00127264	0.000546671	0.000298256	0.747419	1.04514
WT#3	0.00667815	0.0750808	0.233333	1.16105	1.05217		WT#3	0.00135568	0.000581861	0.000328649	0.961792	1.15009
KO#1	0.551678	0.195002	0.0133418	0.00696449	0.623162		KO#1	0.00115171	0.000164462	0.00117301	0.00829564	0.272906
KO#2	0.432714	0.18675	0.00678514	0.0146456	0.421966		KO#2	0.00115972	0.0170262	0.00117464	0.00753722	0.37955
KO#3	0.300947	0.248998	0.030154	0.00408973	0.689637		KO#3	0.0115346	0.000205303	0.000231372	0.0144435	0.373716
Hoxd4	24h	48h	72h	96h	120h		Hoxd10	24h	48h	72h	96h	120h
WT#1	0.0924949	0.000534939	0.012935	0.669887	1.14919		WT#1	0.0213885	0.00971146	0.00540976	0.0425334	0.991822
WT#2	0.0525829	0.000542406	0.127072	1.01823	0.98601		WT#2	0.0221428	0.0106272	0.00554261	0.0852213	1.09897
WT#3	0.051145	0.000842907	0.0327477	0.314798	0.864802		WT#3	0.0286163	0.00991552	0.0073389	0.0274841	0.90921
KO#1	0.0790467	0.00030296	0.000330437	4.37818	8.91319		KO#1	0.0364366	0.00550004	0.00552008	0.00694413	0.177397
KO#2	0.0869932	0.000329237	0.000279796	6.05896	8.46507		KO#2	0.0285789	0.00550004	0.00507951	0.00825801	0.282078
KO#3	0.0334662	0.00144113	0.000283701	4.28046	9.66171		KO#3	0.0289778	0.011388	0.00515041	0.00866857	0.183585
