# Supplementary material for: BMAL1 coordinates energy metabolism and differentiation of pluripotent stem cells
Source: Life Sci Alliance. 2020 Apr 13;3(5):e201900534. doi: 10.26508/lsa.201900534 (PMC7156282; doi:10.26508/lsa.201900534)
Supplement: Supplementary file 6 [file LSA-2019-00534_TableS1.xlsx]

## Sheet: Misregulated genes
LocName	GeneID	Chr	Start	End	WT_rep1	WT_rep2	Bmal1_KO_0	Bmal1_KO_1	>2FC & SIGN
XLOC_013765	Bfsp1	chr2	143826527	143863173	0.73594	0.737347	0.127812	0.0770385	DOWN
XLOC_023117	Sdr42e1	chr8	117661398	117673659	1.62825	2.02474	0.259423	0.258484	DOWN
XLOC_019472	Tmem40	chr6	115729136	115762466	12.2387	12.3801	1.71993	1.86054	DOWN
XLOC_014898	Rab25	chr3	88542028	88548279	13.2112	13.681	2.29345	1.70199	DOWN
XLOC_013276	Dpp4	chr2	62330072	62412231	3.55601	4.24524	0.562833	0.601479	DOWN
XLOC_020218	Ldhc	chr7	46861262	46878142	1.75419	2.31807	0.50787	0.173315	DOWN
XLOC_014584	6330410L21Rik	chr3	129677574	129763882	0.570816	0.549414	0.124065	0.0704852	DOWN
XLOC_018176	Col26a1	chr5	136741763	136883107	0.537042	0.449951	0.130313	0.0442879	DOWN
XLOC_015780	Tmem54	chr4	129105529	129121925	3.26347	3.94586	0.407589	0.906492	DOWN
XLOC_013700	Prom2	chr2	127526952	127541417	0.972772	0.658141	0.170884	0.147066	DOWN
XLOC_012661	Tgm3	chr2	130012339	130050399	6.6723	7.21021	1.35117	1.39655	DOWN
XLOC_002265	Slc5a4b	chr10	76058620	76111018	1.28351	0.905813	0.309033	0.145104	DOWN
XLOC_013619	Meis2	chr2	115861263	116067431	4.86628	4.92064	0.927532	1.10426	DOWN
XLOC_016048	Esrp1	chr4	11331932	11386783	15.0262	15.4684	2.973	3.58826	DOWN
XLOC_008711	G730013B05Rik	chr16	50526231	50559459	1.33409	2.14041	0.32382	0.450371	DOWN
XLOC_025575	Prrg1	chrX	78449609	78583897	0.594309	0.481569	0.0923594	0.149384	DOWN
XLOC_020634	Trim72	chr7	128004377	128011393	0.497353	0.83306	0.123661	0.175449	DOWN
XLOC_007342	Ptk2b	chr14	66153256	66281052	8.53558	7.83085	2.09642	1.76936	DOWN
XLOC_017952	Zfp951	chr5	104811652	104860068	1.44318	1.83309	0.34967	0.441759	DOWN
XLOC_010721	Ctxn3	chr18	57468485	57478134	1.08292	1.04696	0.25413	0.260775	DOWN
XLOC_016300	Cdkn2a	chr4	89274472	89294619	34.4634	29.8813	8.50386	7.14019	DOWN
XLOC_005182	Tmem30b	chr12	73543113	73546395	4.19448	4.01974	0.958901	1.06141	DOWN
XLOC_019577	Pzp	chr6	128438756	128526720	2.94069	3.60005	0.884863	0.72628	DOWN
XLOC_016720	Slc45a1	chr4	150629395	150652174	1.00114	0.855865	0.257751	0.202169	DOWN
XLOC_009636	Rnf39	chr17	36941240	36951792	10.9002	8.6913	2.51357	2.37113	DOWN
XLOC_010186	Rnf39	chr17	36941240	36951792	0.788425	0.675568	0.354584	0.46634	DOWN
XLOC_021057	Cyp2b23	chr7	26665226	26700244	0.815417	0.614138	0.197683	0.171065	DOWN
XLOC_001216	Ddr2	chr1	169969408	170088944	0.308521	0.710605	0.134684	0.133993	DOWN
XLOC_005259	Ism2	chr12	87278637	87302556	0.899072	1.41859	0.320026	0.294803	DOWN
XLOC_023814	Prss35	chr9	86743129	86758439	3.23783	3.50462	0.80932	0.995944	DOWN
XLOC_021763	Spn	chr7	127132231	127137823	2.73204	2.52936	0.673042	0.747311	DOWN
XLOC_023998	Eomes	chr9	118478188	118486731	2.20857	2.24871	0.462869	0.774676	DOWN
XLOC_014348	Nup210l	chr3	90104131	90212017	0.517933	0.457715	0.193245	0.0841903	DOWN
XLOC_008246	Smc1b	chr15	85064688	85131957	1.41708	2.41748	0.635754	0.466461	DOWN
XLOC_016049	Pdp1	chr4	11958182	11966450	1.70304	2.15512	0.465664	0.643947	DOWN
XLOC_000405	Lrrn2	chr1	132880354	132940005	4.48359	3.7317	1.41228	0.963386	DOWN
XLOC_001624	4632428N05Rik	chr10	60302749	60696490	0.627493	0.573928	0.157006	0.198999	DOWN
XLOC_024269	Foxr1	chr9	44433331	44441273	3.66741	2.76096	0.696987	1.22229	DOWN
XLOC_001856	Hal	chr10	93488767	93516743	0.817225	0.66698	0.261853	0.181623	DOWN
XLOC_002393	Spic	chr10	88674785	88685065	0.686828	0.802321	0.244279	0.210926	DOWN
XLOC_000808	1700019A02Rik	chr1	53158167	53187617	5.72582	5.32309	1.23719	2.20624	DOWN
XLOC_004576	Pfn4	chr12	4739936	4778786	1.71165	1.61751	0.61111	0.440752	DOWN
XLOC_008837	Ppl	chr16	5086290	5132481	0.864652	0.869842	0.252722	0.296439	DOWN
XLOC_017346	Pla2g1b	chr5	115465122	115474717	75.6755	76.6325	24.5027	23.9536	DOWN
XLOC_003579	Hormad2	chr11	4345813	4441136	4.82306	5.79391	1.60062	1.79654	DOWN
XLOC_007307	Tnfrsf19	chr14	60963833	61046855	0.844586	0.683698	0.241123	0.249835	DOWN
XLOC_018258	Tmem130	chr5	144735914	144761578	0.678771	0.547605	0.288439	0.109939	DOWN
XLOC_006813	Gm10364	chr14	55038461	55042976	1.56966	1.42626	0.66491	0.30903	DOWN
XLOC_019036	Arntl2	chr6	146805529	146833529	0.835185	0.41835	0.11029	0.298182	DOWN
XLOC_013644	Pla2g4e	chr2	120166411	120245335	2.20043	2.06362	0.712958	0.680837	DOWN
XLOC_015337	Ccne2	chr4	11175693	11254259	4.29445	6.01285	1.38765	1.99225	DOWN
XLOC_016045	Ccne2	chr4	11175693	11254259	2.9396	2.9277	1.76868	1.40058	DOWN
XLOC_014126	Car3	chr3	14863537	14872373	1.1096	0.948044	0.29209	0.382816	DOWN
XLOC_024270	Upk2	chr9	44452714	44454767	3.95996	4.30288	1.02487	1.71162	DOWN
XLOC_018610	Evx1	chr6	52308388	52318378	1.52133	1.06541	0.527784	0.330137	DOWN
XLOC_017935	Plac8	chr5	100553732	100572205	30.1767	24.4981	10.4951	8.57293	DOWN
XLOC_010147	Apom	chr17	35128996	35131752	3.07941	2.09005	0.609679	1.21405	DOWN
XLOC_013063	A930004D18Rik	chr2	18025188	18037741	3.16994	3.1989	1.09287	1.17169	DOWN
XLOC_012216	Ptgs1	chr2	36222501	36252271	1.92955	1.5014	0.61786	0.616154	DOWN
XLOC_009717	AI661453	chr17	47412733	47470638	4.5322	3.55196	1.62712	1.29385	DOWN
XLOC_005194	Gpx2	chr12	76792334	76795554	29.401	31.1163	11.3593	10.6744	DOWN
XLOC_015730	Hpcal4	chr4	123183503	123194699	0.542477	0.372302	0.127714	0.205585	DOWN
XLOC_021737	Lat	chr7	126363822	126369550	5.59539	4.15138	1.74307	1.83228	DOWN
XLOC_014581	Pitx2	chr3	129199877	129219594	0.729257	0.63973	0.211025	0.291969	DOWN
XLOC_015698	2610528J11Rik	chr4	118527274	118530217	6.47107	5.60024	2.44003	2.01503	DOWN
XLOC_010774	Slmo1	chr18	67464848	67480596	2.76294	2.53078	1.16584	0.813123	DOWN
XLOC_016521	Serinc2	chr4	130253496	130275586	1.3721	0.926594	0.538686	0.321135	DOWN
XLOC_018893	Mfap5	chr6	122513675	122529287	2.43064	2.45309	0.890005	0.936787	DOWN
XLOC_013950	Bcas1	chr2	170346990	170427845	1.41304	1.81336	0.577501	0.62964	DOWN
XLOC_010971	Ccdc112	chr18	46282138	46311928	11.9559	14.9851	4.59836	5.5244	DOWN
XLOC_014590	Lef1	chr3	131110296	131224357	0.736055	0.540017	0.154636	0.327768	DOWN
XLOC_012833	Myl9	chr2	156775463	156781657	7.01703	5.83538	2.76035	2.10129	DOWN
XLOC_021513	Lrrc51	chr7	101912735	101933857	1.76765	1.42823	0.597055	0.619505	DOWN
XLOC_010974	Ticam2	chr18	46557393	46574959	1.61322	1.49801	0.600129	0.592672	DOWN
XLOC_013342	Tfpi	chr2	84432852	84476782	44.0229	45.4625	17.7659	16.5613	DOWN
XLOC_004823	Tmem63c	chr12	87026563	87091327	0.689576	0.559804	0.280925	0.19873	DOWN
XLOC_019555	Plekhg6	chr6	125362527	125380504	1.11697	0.609264	0.358857	0.305694	DOWN
XLOC_013354	P2rx3	chr2	84996551	85035834	0.988157	0.761724	0.317113	0.363526	DOWN
XLOC_023103	Chst5	chr8	111889134	111910199	3.82447	3.1942	1.50733	1.24243	DOWN
XLOC_003018	Cldn7	chr11	69964778	69967886	14.5158	11.2547	6.03359	4.07737	DOWN
XLOC_016554	Sfn	chr4	133600555	133602168	84.6289	79.0187	34.7999	29.7269	DOWN
XLOC_010960	Jakmip2	chr18	43531254	43687773	0.546137	0.884917	0.228834	0.343169	DOWN
XLOC_003844	Slc47a2	chr11	61301630	61342860	1.55318	1.19585	0.689123	0.410577	DOWN
XLOC_019553	Tuba3a	chr6	125278273	125286042	12.8364	13.8056	5.48886	5.22376	DOWN
XLOC_013731	A730017L22Rik	chr2	130872540	130906396	1.10331	1.01187	0.350003	0.500895	DOWN
XLOC_020209	Ccdc114	chr7	45928397	45948960	3.40948	3.08808	1.39533	1.22155	DOWN
XLOC_002378	Fhl4	chr10	85097018	85102495	0.658434	0.934402	0.332457	0.310683	DOWN
XLOC_022631	Kcnk1	chr8	125995101	126030856	17.0504	16.8273	6.66703	7.0205	DOWN
XLOC_013287	Galnt3	chr2	66082765	66124793	0.826608	0.940313	0.416302	0.307539	DOWN
XLOC_024561	Col6a4	chr9	105990200	106096691	1.26062	1.46502	0.62989	0.48973	DOWN
XLOC_010811	Pstpip2	chr18	77789939	77882881	4.7602	5.23436	1.79513	2.31538	DOWN
XLOC_015794	Adgrb2	chr4	129984869	130022633	2.18251	1.97527	0.853521	0.857278	DOWN
XLOC_009590	Ly6g6e	chr17	35071347	35078804	5.96133	6.47823	2.71623	2.42311	DOWN
XLOC_021053	Cyp2s1	chr7	25802400	25816685	8.66697	7.81188	3.3768	3.43226	DOWN
XLOC_019062	Pon2	chr6	5256894	5298455	4.49104	5.6774	2.05463	2.17405	DOWN
XLOC_020710	Urah	chr7	140834922	140846769	41.0015	39.6973	15.9807	17.6288	DOWN
XLOC_000268	Efhd1	chr1	87264363	87310833	2.06577	2.4729	0.923184	0.969885	DOWN
XLOC_018784	1810044D09Rik	chr6	91440986	91441755	11.537	9.04331	4.81064	3.79249	DOWN
XLOC_013326	Cyct	chr2	76353941	76360453	8.71819	8.53814	3.96389	3.2867	DOWN
XLOC_023143	Snai3	chr8	122454201	122460708	5.243	4.03103	2.40059	1.50602	DOWN
XLOC_011162	Sptbn2	chr19	4711222	4753206	4.84902	4.31356	1.8911	1.97556	DOWN
XLOC_014162	Gpr160	chr3	30855949	30897217	5.90492	5.01807	2.5363	2.08787	DOWN
XLOC_009837	Plekhh2	chr17	84511851	84622142	1.69109	2.2815	0.667243	1.02182	DOWN
XLOC_013079	Pax8	chr2	24420550	24475599	1.40137	1.03992	0.448712	0.59455	DOWN
XLOC_007776	Wbp2nl	chr15	82298983	82317027	1.63011	1.16633	0.756289	0.438813	DOWN
XLOC_011824	Crtac1	chr19	42283036	42431783	1.89101	1.89334	0.984601	0.647929	DOWN
XLOC_006154	Gfod1	chr13	43194615	43304571	8.97321	7.92648	3.32551	3.97165	DOWN
XLOC_015339	1110037F02Rik	chr4	11485957	11551143	12.7244	13.2038	5.31019	5.88576	DOWN
XLOC_004617	Grhl1	chr12	24572286	24617450	4.68002	4.93799	2.08396	2.0744	DOWN
XLOC_018159	Fkbp6	chr5	135291703	135350044	3.05231	3.2178	1.50084	1.22352	DOWN
XLOC_021122	Zbtb32	chr7	30589640	30602799	15.0429	14.1924	7.19837	5.59755	DOWN
XLOC_008532	Pkp2	chr16	16213344	16272712	26.2552	26.2225	11.5636	11.643	DOWN
XLOC_009343	Lix1	chr17	17402685	17459388	0.700477	0.99285	0.296579	0.456213	DOWN
XLOC_017363	Tesc	chr5	118027823	118061870	2.47329	3.07586	1.12029	1.34799	DOWN
XLOC_005085	Bcap29	chr12	31595353	31634658	19.0528	24.1417	8.51335	10.751	DOWN
XLOC_024349	4930563M21Rik	chr9	55956174	55980932	1.13497	1.14936	0.601205	0.418396	DOWN
XLOC_006163	Nhlrc1	chr13	47012556	47014850	2.57432	2.32714	1.30387	0.884753	DOWN
XLOC_017025	Fosl2	chr5	32136471	32157839	0.582646	0.551879	0.256285	0.255035	DOWN
XLOC_013995	Rbbp8nl	chr2	180275330	180289879	1.53928	1.59869	0.710599	0.711372	DOWN
XLOC_008211	Cenpm	chr15	82226387	82244747	47.7764	44.0366	22.1049	19.6105	DOWN
XLOC_010385	Nlrc4	chr17	74426294	74459108	0.69019	0.889439	0.347943	0.370482	DOWN
XLOC_015203	Lmo4	chr3	144188529	144205255	28.1614	27.5523	13.3858	12.0993	DOWN
XLOC_006949	Ccdc122	chr14	77036771	77112381	1.43087	2.04354	0.883154	0.707795	DOWN
XLOC_010688	Arl14epl	chr18	46921814	46934223	2.03389	1.87547	0.905767	0.887742	DOWN
XLOC_017842	Sgcb	chr5	73632748	73647731	3.60241	3.19667	1.51224	1.6131	DOWN
XLOC_013998	Tcfl5	chr2	180598221	180642700	25.0138	27.5059	12.8909	11.2631	DOWN
XLOC_010254	Slc22a7	chr17	46432184	46438477	5.33023	4.51421	2.15713	2.40586	DOWN
XLOC_018180	Serpine1	chr5	137061503	137072272	1.41775	1.03964	0.499331	0.642973	DOWN
XLOC_017691	Cnpy1	chr5	28200419	28237873	21.3233	21.1708	9.36343	10.4108	DOWN
XLOC_019551	Tapbpl	chr6	125224211	125239934	2.26865	2.39679	1.15229	1.02808	DOWN
XLOC_010263	Gnmt	chr17	46725588	46729165	2.22605	3.0602	1.34046	1.1473	DOWN
XLOC_020005	Hipk4	chr7	27523260	27531174	2.13115	2.28099	1.20557	0.8841	DOWN
XLOC_014523	Gnat2	chr3	108086760	108101430	1.86174	2.29588	1.13685	0.840616	DOWN
XLOC_021123	Upk1a	chr7	30603084	30612734	6.40015	5.19216	3.09192	2.42742	DOWN
XLOC_016050	Tmem67	chr4	12039355	12088007	1.41526	1.74308	0.721385	0.786629	DOWN
XLOC_006892	Clu	chr14	65968482	65981545	7.23794	7.26104	3.68349	3.24839	DOWN
XLOC_024000	Itga9	chr9	118606708	118901003	9.16856	8.31187	4.03498	4.3237	DOWN
XLOC_018491	Stra8	chr6	34920959	34939342	2.10764	1.61925	0.597641	1.19086	DOWN
XLOC_019150	Atp6v0a4,D630045J12Rik	chr6	38048482	38254265	2.47872	2.48397	1.23332	1.14936	DOWN
XLOC_019147	Dgki	chr6	36846021	37299976	1.3325	1.15545	0.621994	0.578027	DOWN
XLOC_006420	Ocln	chr13	100497366	100553109	2.83574	2.65078	1.19545	1.46195	DOWN
XLOC_004347	Slc16a6	chr11	109440077	109611441	9.47653	9.22582	4.69922	4.36035	DOWN
XLOC_015896	Arhgef19	chr4	141239512	141257656	1.23782	0.856344	0.503973	0.512424	DOWN
XLOC_006042	Prss16	chr13	22002175	22009741	1.3815	1.11001	0.445857	0.763419	DOWN
XLOC_022356	4930432K21Rik	chr8	84148037	84172597	2.71812	2.43447	1.34021	1.17184	DOWN
XLOC_018026	Foxn4	chr5	114254163	114273761	3.23864	2.85936	1.52478	1.45064	DOWN
XLOC_025701	Nxf3	chrX	136072098	136085255	0.759764	0.796406	0.337734	0.424572	DOWN
XLOC_009728	Treml2	chr17	48299831	48312534	0.689297	0.622372	0.347616	0.29618	DOWN
XLOC_005195	Rab15	chr12	76797962	76822524	6.76986	6.18449	3.30388	3.05929	DOWN
XLOC_009277	Tiam2	chr17	3326572	3559863	1.58196	1.35087	0.732666	0.710727	DOWN
XLOC_005620	Hist1h1c	chr13	23738806	23740323	5.51379	7.62435	3.69925	2.77726	DOWN
XLOC_015591	Ak4	chr4	101419288	101467771	9.04346	8.80154	4.56832	4.23109	DOWN
XLOC_006347	Rfesd	chr13	76001534	76018712	2.66064	3.88641	1.77227	1.45621	DOWN
XLOC_014889	Tmem79	chr3	88328652	88334433	16.6658	14.4745	8.22326	7.13811	DOWN
XLOC_000555	Pvrl4	chr1	171370172	171388287	0.708982	0.431717	0.275288	0.288296	DOWN
XLOC_016985	En2	chr5	28165392	28172166	6.81945	5.39143	3.05176	2.9929	DOWN
XLOC_005818	F630042J09Rik	chr13	67278593	67283871	0.641294	0.623057	0.324945	0.301776	DOWN
XLOC_022391	Gm2694	chr8	87472763	87525554	19.8435	18.4251	9.90816	9.07696	DOWN
XLOC_018717	Mob1a	chr6	83325637	83343770	9.99526	10.0435	19.5183	20.56	UP
XLOC_019875	Nova2	chr7	18925454	18965319	0.603726	0.45073	1.1731	0.939849	UP
XLOC_001528	Ctgf	chr10	24595441	24598682	6.75726	6.15397	12.6859	13.2531	UP
XLOC_011211	Rasgrp2	chr19	6399076	6415416	8.88659	8.29894	17.6552	16.9111	UP
XLOC_018679	Chmp3	chr6	71543853	71581574	15.7475	17.0756	31.9375	34.156	UP
XLOC_023483	Esam	chr9	37528088	37538538	1.67356	1.5023	3.30209	3.09294	UP
XLOC_008583	Chrd	chr16	20724453	20742384	0.698626	0.684907	1.42957	1.35761	UP
XLOC_024304	Ttc12	chr9	49436960	49486225	1.85638	2.27028	4.41207	3.91149	UP
XLOC_002011	Cd63	chr10	128905608	128912818	78.1915	82.6989	155.489	169.199	UP
XLOC_003402	Fmnl1	chr11	103171007	103218432	1.06019	0.972153	2.26597	1.83792	UP
XLOC_021832	Nkx6-2	chr7	139389108	139582797	4.41129	4.75252	8.82327	9.72761	UP
XLOC_002253	Susd2	chr10	75636618	75644008	4.93835	3.94049	9.07925	8.8948	UP
XLOC_015588	Cachd1	chr4	100776374	101004554	1.44801	1.07046	2.48691	2.61476	UP
XLOC_001871	Btg1	chr10	96617000	96622811	2.9133	3.13351	5.64191	6.61051	UP
XLOC_022745	Plekha2	chr8	25039143	25102500	2.69583	3.04784	5.68493	5.9583	UP
XLOC_003002	Kcnab3	chr11	69326257	69333041	1.50162	1.17206	2.77346	2.66265	UP
XLOC_008804	Ripply3	chr16	94328421	94336935	1.79128	1.54428	3.7652	3.02534	UP
XLOC_019352	Exoc6b	chr6	84618485	85069513	5.93738	5.73002	11.7551	12.0056	UP
XLOC_018745	Nfu1	chr6	87008541	87028461	86.5274	93.0348	181.727	184.185	UP
XLOC_018670	Eif2ak3	chr6	70844521	70905241	3.48666	3.05689	6.81819	6.51663	UP
XLOC_000527	Creg1	chr1	165763779	165775304	1.78758	1.91242	3.44507	4.09969	UP
XLOC_009311	Agpat4	chr17	12118748	12219640	7.0064	6.85058	14.3775	13.9125	UP
XLOC_001202	Dusp27	chr1	166098147	166128070	8.79717	8.99121	19.1269	17.2265	UP
XLOC_008309	Hdac7	chr15	97784364	97844502	0.794596	0.720106	1.72909	1.36935	UP
XLOC_009582	Neu1	chr17	34931151	34937297	2.9563	2.86637	6.04711	5.86793	UP
XLOC_000757	Sema4c	chr1	36548638	36558381	0.411159	0.22711	0.75697	0.551731	UP
XLOC_007823	Mapk8ip2	chr15	89453774	89463880	0.666432	0.575536	1.43754	1.11028	UP
XLOC_020830	Zfp773	chr7	7126864	7136755	0.347141	0.347929	0.737168	0.688787	UP
XLOC_009832	Pkdcc	chr17	83215282	83225069	0.548032	0.441189	1.15381	0.878108	UP
XLOC_022924	Pou4f2	chr8	78433008	78436652	5.31638	6.09236	11.3197	12.1178	UP
XLOC_022015	Evi5l	chr8	4166510	4208041	1.55967	1.31751	3.22059	2.71103	UP
XLOC_011586	Snx32	chr19	5495247	5510489	0.417571	0.70678	1.09121	1.22926	UP
XLOC_009025	Slc15a2	chr16	36750163	36784962	1.17131	1.31034	2.44428	2.68162	UP
XLOC_009735	Mocs1	chr17	49428363	49455430	5.81116	5.43023	12.2698	10.9827	UP
XLOC_003394	Gm1564	chr11	102665387	102682408	0.607669	0.775747	1.15735	1.71082	UP
XLOC_008275	Arsa	chr15	89472475	89484850	2.25689	2.06023	5.03944	3.91616	UP
XLOC_007574	Ank	chr15	27466676	27594907	1.02496	0.868941	1.98316	1.95593	UP
XLOC_001225	Fcgr2b	chr1	170960558	170976549	2.55968	2.50645	5.15802	5.37952	UP
XLOC_018714	1700003E16Rik	chr6	83152709	83162975	0.286948	0.368705	0.688272	0.675497	UP
XLOC_003165	Tmem98	chr11	80810414	80822033	3.0451	3.13118	6.62082	6.22907	UP
XLOC_000399	Mir135b	chr1	132191435	132257382	1.42472	1.27644	2.95986	2.67043	UP
XLOC_005356	Ckb	chr12	111669354	111672338	166.217	163.992	350.055	339.523	UP
XLOC_019369	Pcyox1	chr6	86386005	86397150	4.12649	4.42219	8.81288	9.06058	UP
XLOC_020533	Parva	chr7	112427705	112591688	0.475145	0.561984	1.12049	1.04897	UP
XLOC_003903	Nlgn2	chr11	69822875	69837964	2.96131	2.12865	5.89115	4.76341	UP
XLOC_007790	Parvb	chr15	84232042	84315609	42.9171	37.7799	88.9457	80.4039	UP
XLOC_003857	Zfp287	chr11	62711485	62731840	0.181465	0.223161	0.355312	0.494118	UP
XLOC_023719	Igdcc4	chr9	65101485	65137947	0.682734	0.501519	1.20687	1.2808	UP
XLOC_006124	Serpinb6c	chr13	33879815	33905708	15.9166	17.3599	33.4957	36.6403	UP
XLOC_018961	Gabarapl1	chr6	129532183	129542331	6.90225	6.5173	14.255	14.03	UP
XLOC_018713	Rtkn	chr6	83125347	83152579	1.85219	1.52255	3.71518	3.40501	UP
XLOC_007522	Sepp1	chr15	3270766	3280508	0.660459	0.540535	1.13538	1.39933	UP
XLOC_007142	Fam213a	chr14	40993739	41013775	2.63642	3.21624	6.52517	5.83765	UP
XLOC_025678	Tspan6	chrX	133891069	133898429	5.45385	6.63936	12.5026	13.0789	UP
XLOC_002295	Syde1	chr10	78584502	78591964	1.9219	1.49227	3.76535	3.46297	UP
XLOC_003246	Mmd	chr11	90249445	90278573	2.35672	2.39149	4.92807	5.13671	UP
XLOC_022901	Plvap	chr8	71494885	71511769	1.01387	1.17498	2.29058	2.35111	UP
XLOC_018074	Oas1g	chr5	120876141	120887620	1.35011	1.75827	3.40954	3.18775	UP
XLOC_022416	Mt3	chr8	94152606	94154148	24.815	20.9947	49.0494	48.2438	UP
XLOC_017040	Nat8l	chr5	33995983	34005916	0.435901	0.321439	0.916986	0.692879	UP
XLOC_002957	Fbxw10	chr11	62847122	62877462	0.296426	0.25864	0.505609	0.675436	UP
XLOC_010535	Zeb1	chr18	5491500	5775468	1.10961	1.32949	2.47308	2.7247	UP
XLOC_000918	Serpine2	chr1	79794320	79858665	1.10878	0.899784	2.38225	1.90855	UP
XLOC_011617	Kcnk4,Tex40	chr19	6922423	6934515	5.5095	3.41995	9.98633	9.1369	UP
XLOC_023929	1700102P08Rik	chr9	108392833	108397767	1.05087	0.979029	1.44202	2.90926	UP
XLOC_024434	Gcnt3	chr9	70031495	70038088	0.239185	0.276592	0.480968	0.627367	UP
XLOC_025179	Tceal1	chrX	136708050	136709866	1.28247	1.21265	2.63967	2.72409	UP
XLOC_008847	Emp2	chr16	10281499	10313968	0.548879	0.432802	1.04019	1.07392	UP
XLOC_005665	Serpinb9b	chr13	33027413	33040864	1.79247	2.30777	4.34766	4.50194	UP
XLOC_007368	Sorbs3	chr14	70180467	70207671	1.73786	1.42145	3.60677	3.21224	UP
XLOC_008569	Klhl24	chr16	20097519	20129219	3.17241	3.47855	6.91182	7.46683	UP
XLOC_024546	Trf	chr9	103208875	103230286	2.1364	1.71693	4.16359	4.17243	UP
XLOC_000219	Speg	chr1	75375296	75432306	1.36595	1.32294	3.06137	2.76843	UP
XLOC_001247	Casq1	chr1	172209893	172219895	3.2687	2.35292	6.77563	5.43838	UP
XLOC_017402	A930024E05Rik	chr5	122989273	122998341	2.39919	2.32048	5.10747	5.18017	UP
XLOC_007136	Cdhr1	chr14	37077848	37098318	0.437945	0.497235	1.09657	0.943035	UP
XLOC_010976	Cdo1	chr18	46713204	46728473	2.71578	2.48287	5.42719	5.93149	UP
XLOC_005071	Sox11	chr12	27334267	27342837	1.7133	1.58293	3.66176	3.54142	UP
XLOC_017353	Ccdc60	chr5	116123629	116288985	0.790098	0.623551	1.78904	1.3018	UP
XLOC_018051	Ccdc60	chr5	116123629	116288985	0.848426	0.963058	1.89882	1.32937	UP
XLOC_005834	Irx2	chr13	72628864	72634194	0.825379	0.595357	1.18562	1.92784	UP
XLOC_003730	Sqstm1	chr11	50200151	50211399	58.618	57.6491	133.169	121.768	UP
XLOC_008738	Vgll3	chr16	65815318	65863066	0.429681	0.488356	0.880024	1.13374	UP
XLOC_011545	Aldh3b1	chr19	3912958	3930843	0.812171	0.475656	1.392	1.43364	UP
XLOC_007445	Sox21	chr14	118233233	118261199	0.356852	0.393827	0.953482	0.696353	UP
XLOC_017057	Acox3	chr5	35581226	35613801	2.25583	1.78115	4.50352	4.3762	UP
XLOC_017741	Acox3	chr5	35581226	35613801	0.699763	0.378765	1.42006	1.41289	UP
XLOC_003240	2210409E12Rik	chr11	88968312	88973437	5.58441	5.01369	11.7922	11.57	UP
XLOC_004096	2210409E12Rik	chr11	88968312	88973437	0	0	0.213198	0.0956455	UP
XLOC_018707	Aup1	chr6	83034223	83067219	10.5818	8.63078	22.7234	19.6619	UP
XLOC_008212	Naga	chr15	82329531	82338876	3.08695	2.71179	6.73924	6.07611	UP
XLOC_018681	Immt	chr6	71830934	71877271	37.8693	43.773	84.7771	95.7731	UP
XLOC_021701	Tmc7	chr7	118535843	118584686	0.22059	0.166829	0.356338	0.500527	UP
XLOC_018682	Polr1a	chr6	71909052	71979360	15.6226	14.8119	34.3266	33.0163	UP
XLOC_010291	Satb1	chr17	51736186	51833290	1.35997	0.892872	2.22064	2.76563	UP
XLOC_011245	Ahnak	chr19	8989283	9076926	4.45791	4.10815	9.7962	9.17629	UP
XLOC_025482	Sox3	chrX	60891365	60893430	1.66529	1.42302	3.60464	3.24504	UP
XLOC_003616	Igfbp3	chr11	7206090	7213923	2.98999	3.41579	6.70542	7.50653	UP
XLOC_022336	Tbc1d9	chr8	83165351	83272940	1.6753	1.61792	3.81422	3.50328	UP
XLOC_025064	Efnb1	chrX	99136060	99149022	0.81562	0.565945	1.69479	1.37752	UP
XLOC_023810	Tpbg	chr9	85842379	85847055	1.12915	1.2074	2.50156	2.7042	UP
XLOC_019845	Meis3	chr7	16175377	16186508	0.581319	0.408214	1.38252	0.822177	UP
XLOC_014261	Mfsd1	chr3	67582767	67604231	13.8106	14.2635	31.6933	30.9004	UP
XLOC_019354	Spr	chr6	85133679	85137764	45.4341	37.8222	99.1592	86.5951	UP
XLOC_008263	Mapk12	chr15	89130422	89140703	2.97486	2.3255	6.1779	5.66151	UP
XLOC_018686	Tmem150a	chr6	72355472	72362381	5.16136	4.24258	11.3582	9.66052	UP
XLOC_010684	Kcnn2	chr18	45558074	46045260	0.933178	0.762496	0.755907	0.966675	UP
XLOC_010967	Kcnn2	chr18	45558074	46045260	2.88186	2.84628	7.44192	5.36303	UP
XLOC_018701	Gcfc2	chr6	81923649	81965949	2.60896	2.67813	5.51105	6.31814	UP
XLOC_009150	App	chr16	84954435	85173707	0.735971	0.945196	1.77591	1.98817	UP
XLOC_005563	Elmo1	chr13	20090506	20608356	2.3376	2.08748	5.10779	4.80226	UP
XLOC_016717	Spsb1	chr4	149896283	149955006	2.04457	1.7696	4.71142	3.83264	UP
XLOC_014842	Golim4	chr3	75876182	75956949	0.966032	0.917198	2.01554	2.20475	UP
XLOC_022735	1810011O10Rik	chr8	24437615	24438946	0.982283	0.446246	1.49863	1.70344	UP
XLOC_001665	Fam13c	chr10	70440667	70599291	0.901226	0.941043	1.789	2.34172	UP
XLOC_006334	Nkd2	chr13	73819327	73847631	0.34997	0.314074	0.720344	0.768907	UP
XLOC_022409	Mmp2	chr8	92827327	92853420	1.03676	0.855527	1.97079	2.27346	UP
XLOC_020494	Ppfibp2	chr7	107595040	107758032	1.58168	1.41911	3.62716	3.12136	UP
XLOC_003393	Fzd2	chr11	102604430	102608058	2.9415	3.16666	7.0027	6.73587	UP
XLOC_024592	Ccdc36	chr9	108403531	108431806	0.643194	0.654956	1.46192	1.46143	UP
XLOC_012463	Rapsn	chr2	91035626	91046076	0.948902	0.731331	2.1416	1.64822	UP
XLOC_011252	Syt7	chr19	10389089	10453181	1.00393	0.769357	2.12009	1.88397	UP
XLOC_007706	Apol6	chr15	77015486	77058326	1.7342	1.25596	3.679	3.07512	UP
XLOC_014608	Ddit4l	chr3	137623671	137628332	1.04326	1.18072	2.45971	2.57396	UP
XLOC_004261	Plekhh3	chr11	101162519	101171321	0.866218	0.650615	1.57975	1.85364	UP
XLOC_010045	Tcp11	chr17	28066504	28080639	1.26784	1.16884	3.47442	2.04135	UP
XLOC_021412	Cpeb1	chr7	81347025	81454794	0.454971	0.306573	1.05732	0.667735	UP
XLOC_018685	0610030E20Rik	chr6	72347066	72353482	1.78764	1.8579	4.14095	4.11947	UP
XLOC_014280	Fam198b	chr3	79884590	79946278	0.185479	0.200849	0.477538	0.398331	UP
XLOC_018724	Nagk	chr6	83795046	83802556	4.8184	4.63986	11.0759	10.387	UP
XLOC_004258	Ptrf	chr11	100956730	100970617	9.99165	10.7901	24.4619	22.7284	UP
XLOC_001046	Cd55	chr1	130438840	130462854	0.778547	0.981576	1.77005	2.23067	UP
XLOC_019383	Aplf	chr6	87628428	87672168	2.38309	2.24113	5.46109	5.05649	UP
XLOC_022995	Crnde	chr8	92326030	92356120	1.11022	0.789125	1.87538	2.44744	UP
XLOC_024074	Endod1	chr9	14353989	14381242	0.354224	0.436903	1.00224	0.80093	UP
XLOC_013203	Phf19	chr2	34893754	34914340	2.49915	2.2761	5.4026	5.48175	UP
XLOC_015871	Camk2n1	chr4	138455147	138460126	0.383312	0.483142	1.03878	0.93673	UP
XLOC_000136	Aox1	chr1	58029968	58106410	0.235556	0.377977	0.402914	0.997075	UP
XLOC_016246	Akna	chr4	63367122	63410711	1.0987	0.945821	2.56909	2.10592	UP
XLOC_011386	Stambpl1	chr19	34192261	34240328	0.507543	0.672036	1.18734	1.51634	UP
XLOC_016730	Espn	chr4	152120331	152152390	1.25125	1.30907	3.18071	2.69294	UP
XLOC_018687	Ggcx	chr6	72414307	72431130	1.44822	1.46509	3.38197	3.3101	UP
XLOC_010748	Il17b	chr18	61687934	61692537	2.2931	1.43864	4.41702	4.1789	UP
XLOC_017438	Piwil1	chr5	128736245	128755474	0.191478	0.186245	0.456885	0.413541	UP
XLOC_019386	Rab43	chr6	87788852	87812164	0.321251	0.384775	0.847865	0.77992	UP
XLOC_007026	Gm3558	chr14	7545150	7568566	0.827785	1.13915	1.93145	2.60769	UP
XLOC_019339	Tet3	chr6	83362373	83457134	0.824568	0.573431	1.71604	1.51089	UP
XLOC_009601	H2-D1,H2-L	chr17	35262773	35267497	2.48842	2.45958	5.58355	5.83854	UP
XLOC_017973	Cplx1	chr5	108518553	108550027	2.36857	1.80997	5.01	4.64594	UP
XLOC_023232	Mir669e	chr8	39467447	40227787	0.248006	0.266117	0.647349	0.543955	UP
XLOC_022129	Nkx6-3	chr8	23151418	23167503	8.04938	7.19817	33.7483	31.5643	UP
XLOC_022731	Nkx6-3	chr8	23151418	23167503	0.753853	0.789613	1.76462	1.81548	UP
XLOC_021515	Art5	chr7	102096878	102100886	0.689191	0.409538	1.50103	1.0486	UP
XLOC_023125	Cotl1	chr8	119809213	119840579	31.3057	28.3058	71.5614	67.097	UP
XLOC_002136	Clvs2	chr10	33512289	33624672	0.486591	0.821003	1.41313	1.63254	UP
XLOC_019956	Cadm4	chr7	24482016	24504556	3.03078	3.26973	7.83661	6.86068	UP
XLOC_002781	Ebf1	chr11	44618099	45008096	0.389058	0.396857	0.837898	0.999114	UP
XLOC_019117	Kcp	chr6	29482035	29507952	0.260194	0.266777	0.578745	0.659329	UP
XLOC_011458	Lzts2	chr19	45014517	45045914	5.65922	3.97558	13.0817	9.58008	UP
XLOC_018712	Mogs	chr6	83115496	83118900	7.48183	6.45348	17.7082	15.1221	UP
XLOC_016744	Prdm16	chr4	154316124	154636883	0.750469	0.596998	1.77639	1.40382	UP
XLOC_010840	Mkx	chr18	6934965	7004779	0.452629	0.569756	0.986249	1.42774	UP
XLOC_012157	Phyhd1	chr2	30264067	30283978	1.02405	1.16038	2.58824	2.57439	UP
XLOC_000964	Hes6	chr1	91411482	91413223	5.75882	4.96166	14.9059	10.4536	UP
XLOC_019329	Hk2	chr6	82725026	82774454	30.7165	29.4705	73.4544	69.1794	UP
XLOC_022209	Aga	chr8	53511701	53523422	5.45031	5.60059	12.9716	13.2384	UP
XLOC_004989	Kif26a	chr12	112144163	112181747	2.65414	2.32706	6.29404	5.57291	UP
XLOC_024113	Olfm2	chr9	20667369	20746334	0.570663	0.968696	1.86791	1.81035	UP
XLOC_009686	Rcan2	chr17	43801850	44039516	0.710376	0.447378	1.50257	1.26732	UP
XLOC_008167	Card10	chr15	78775135	78803042	1.88162	1.31606	4.05638	3.59602	UP
XLOC_025803	Msl3	chrX	168651286	168673902	0.799414	0.864321	1.87311	2.10863	UP
XLOC_002411	Elk3	chr10	93247415	93311159	1.19379	1.23315	2.73133	3.0783	UP
XLOC_001479	Plagl1	chr10	13090744	13131695	0.460101	0.518201	1.14942	1.19279	UP
XLOC_005997	Gpr137b	chr13	13357619	13393713	1.67568	1.4438	3.48461	3.98811	UP
XLOC_013911	Pltp	chr2	164830729	164859775	15.795	14.0081	37.1535	34.2603	UP
XLOC_004631	Pxdn	chr12	29938035	30017658	0.563828	0.495202	1.30383	1.23459	UP
XLOC_019373	Mxd1	chr6	86647044	86669159	0.55122	0.693244	1.5398	1.44423	UP
XLOC_002938	Kcnj12	chr11	61022563	61073267	0.818466	0.820651	1.95118	1.9831	UP
XLOC_005911	Serf1	chr13	100108018	100114233	3.68372	3.06598	9.31297	7.01807	UP
XLOC_000681	Sntg1	chr1	8359738	9299877	0.00544539	0.0197952	0.0175464	0.0131795	UP
XLOC_001360	Sntg1	chr1	8359738	9299877	5.60194	3.16554	10.1259	7.87754	UP
XLOC_001361	Sntg1	chr1	8359738	9299877	2.86456	3.44399	6.73108	8.54016	UP
XLOC_018576	Repin1	chr6	48593882	48599082	2.59422	2.55447	6.58599	5.91441	UP
XLOC_007683	Grina	chr15	76246806	76249904	4.61983	3.23634	11.304	7.79791	UP
XLOC_022239	Nat2	chr8	67494874	67502578	0.600793	0.766298	1.63856	1.70402	UP
XLOC_014125	Car13	chr3	14641717	14663805	3.5978	4.05465	8.96612	9.74821	UP
XLOC_013791	Acss1	chr2	150618110	150668932	1.6876	1.81916	4.51792	4.08207	UP
XLOC_000218	Des	chr1	75360291	75375015	1.45382	1.17401	3.5203	2.92898	UP
XLOC_010861	Kctd1	chr18	14968251	15151446	1.66018	1.86939	5.01021	3.65932	UP
XLOC_022452	Cmtm3	chr8	104340593	104347672	1.89547	1.69261	5.32738	3.49428	UP
XLOC_013681	Fbn1	chr2	125300593	125506438	0.284045	0.262809	0.64911	0.695691	UP
XLOC_018069	Dtx1	chr5	120680207	120711669	3.48585	3.20965	8.83844	7.65541	UP
XLOC_022155	Rnf122	chr8	31111757	31131473	0.228706	0.167575	0.525924	0.451212	UP
XLOC_019572	Tead4	chr6	128224294	128300913	4.74726	4.07965	11.3535	10.5331	UP
XLOC_023621	Plet1	chr9	50488798	50505639	1.63612	1.41493	4.08373	3.48249	UP
XLOC_008253	Cerk	chr15	86139100	86186141	0.185066	0.315043	0.69565	0.545284	UP
XLOC_025801	Prps2	chrX	167346327	167382729	3.51108	2.93458	7.75734	8.2375	UP
XLOC_007265	Ripk3	chr14	55784994	55788857	3.9108	3.09924	8.4681	8.99633	UP
XLOC_016204	D630039A03Rik	chr4	57908383	57916264	0.355059	0.351456	0.973147	0.787621	UP
XLOC_025664	Hmgn5	chrX	109004536	109013380	3.19406	3.66669	7.58907	9.59427	UP
XLOC_019343	Stambp	chr6	83543205	83588126	0.888165	1.33065	2.41841	3.14264	UP
XLOC_016183	Tmem246	chr4	49584505	49597870	0.214776	0.296221	0.571099	0.717071	UP
XLOC_019376	Anxa4	chr6	86736837	86793584	7.41297	7.49773	19.5749	18.0357	UP
XLOC_004043	Slfn8,Slfn9	chr11	82979019	83020810	0.255	0.123811	0.437828	0.522924	UP
XLOC_014838	Zbbx	chr3	75037906	75155502	0.409332	0.452253	0.786478	1.40315	UP
XLOC_010311	Sema6b	chr17	56123084	56140343	0.552049	0.735379	1.80955	1.4641	UP
XLOC_003048	Wscd1	chr11	71750702	71789784	0.928569	0.957889	2.35055	2.46372	UP
XLOC_022933	Hhip	chr8	79965850	80058008	0.328398	0.383857	0.82182	1.00611	UP
XLOC_017239	Anxa3	chr5	96793384	96845968	1.05417	1.12047	2.9032	2.68824	UP
XLOC_009913	Dact2	chr17	14195229	14203831	5.88357	5.41489	15.6597	13.616	UP
XLOC_007891	Grasp	chr15	101221190	101234045	11.3678	9.35581	28.2767	25.5223	UP
XLOC_008366	Grasp	chr15	101221190	101234045	0.343642	0.519286	0.708422	0.416896	UP
XLOC_018740	Tia1	chr6	86404218	86433405	4.53165	5.09946	11.7726	13.2589	UP
XLOC_022241	Sh2d4a	chr8	68276527	68347704	0.497239	0.255319	1.04136	0.920859	UP
XLOC_014259	Mlf1	chr3	67374096	67400000	0.584538	0.4985	1.42509	1.4098	UP
XLOC_017355	Hspb8	chr5	116408490	116422864	0.435908	0.476268	1.95689	1.6404	UP
XLOC_018052	Hspb8	chr5	116408490	116422864	4.86936	3.88656	12.6788	10.3807	UP
XLOC_006878	Sox7	chr14	63943705	63950732	0.259638	0.246847	0.708548	0.626836	UP
XLOC_018678	Rnf103	chr6	71493876	71510880	0.451205	0.344635	1.21181	0.892755	UP
XLOC_016671	Tnfrsf1b	chr4	145212367	145246870	0.516415	0.541943	1.46237	1.33925	UP
XLOC_019355	Sfxn5	chr6	85213050	85333422	0.18074	0.286492	0.65402	0.587943	UP
XLOC_016190	Abca1	chr4	53030788	53159963	2.37535	2.09332	5.5878	6.31525	UP
XLOC_022580	Jph3	chr8	121730558	121791083	0.215698	0.200863	0.665074	0.445167	UP
XLOC_001142	Ier5	chr1	155096366	155099636	0.407062	0.453231	1.21319	1.08086	UP
XLOC_018757	Gata2	chr6	88198663	88207032	0.718223	0.512931	2.00803	1.27994	UP
XLOC_023686	6030419C18Rik	chr9	58488602	58499742	1.32499	0.809304	3.24808	2.46761	UP
XLOC_002822	Flt4	chr11	49609678	49652739	0.429072	0.3	1.00804	0.944771	UP
XLOC_003899	Fgf11	chr11	69796065	69801918	0.315252	0.311749	0.904091	0.777606	UP
XLOC_021902	Phlda2	chr7	143501547	143503495	74.9716	69.2478	198.034	189.54	UP
XLOC_013677	Slc30a4	chr2	122681232	122702746	0.342649	0.398049	0.935553	1.06231	UP
XLOC_002653	Pisd-ps1	chr11	3123386	3193602	9.0112	9.16502	25.3101	23.7454	UP
XLOC_024077	Piwil4	chr9	14701778	14740733	0.188125	0.466221	1.15887	0.625985	UP
XLOC_010922	Tmem173	chr18	35733677	35740554	0.62824	0.539139	1.76554	1.44542	UP
XLOC_020066	Arhgap33os	chr7	30515121	30522193	0.295719	0.268169	0.877124	0.674496	UP
XLOC_019332	Dok1	chr6	83030935	83033471	0.820472	1.11786	3.01089	2.3316	UP
XLOC_009734	Lrfn2	chr17	48932581	49097590	0.0588118	0.052639	0.16254	0.0397358	UP
XLOC_010496	Lrfn2	chr17	48932581	49097590	0.255967	0.174731	0.615475	0.572098	UP
XLOC_023645	Dnaja4	chr9	54699558	54716317	0.314816	0.230074	0.764578	0.741621	UP
XLOC_005064	Id2	chr12	25093798	25096092	6.69233	7.60297	18.1096	21.4361	UP
XLOC_007625	Aard	chr15	52040106	52045722	19.5372	23.0904	54.1263	63.9016	UP
XLOC_020133	Klk8	chr7	43797560	43803822	3.25762	3.19104	9.11546	8.75132	UP
XLOC_023756	Aldh1a2	chr9	71215788	71296243	0.27165	0.204153	0.659581	0.670776	UP
XLOC_009791	Epb4.1l3	chr17	69156760	69289987	0.56725	0.471094	1.46261	1.44411	UP
XLOC_022169	Dusp4	chr8	34806518	34822087	3.21821	2.85521	8.14737	8.92395	UP
XLOC_004734	Ccdc175	chr12	72085838	72185029	0.261308	0.242212	0.721464	0.699458	UP
XLOC_005173	Ccdc175	chr12	72085838	72185029	0.0270512	0.0556378	0.0146269	0	UP
XLOC_020372	Gdpd5	chr7	99381548	99460984	0.217616	0.0921193	0.556408	0.321996	UP
XLOC_017211	Mthfd2l	chr5	90930802	91021370	1.47243	1.5698	4.16169	4.46791	UP
XLOC_023625	Cryab	chr9	50751071	50756635	1.69657	1.56997	5.37312	3.96589	UP
XLOC_004399	Trim47	chr11	116105749	116110240	0.83734	0.845343	2.50015	2.3144	UP
XLOC_016212	Ptgr1	chr4	58965589	58987078	14.6819	16.2512	42.5177	46.0563	UP
XLOC_019346	Vax2os	chr6	83692805	83738304	2.13207	2.24883	6.57777	5.97065	UP
XLOC_015321	Lyn	chr4	3678110	3791612	0.622518	0.577773	1.37652	2.06181	UP
XLOC_017770	Fgfbp1	chr5	43978857	43981799	2.40215	2.20819	6.17168	7.05004	UP
XLOC_000201	Slc11a1	chr1	74375202	74386286	0.422173	0.510937	1.45416	1.23193	UP
XLOC_017537	Lfng	chr5	140607340	140615545	0.651846	0.364604	1.35898	1.59202	UP
XLOC_015085	Gstm2	chr3	107981701	107986436	6.31316	6.48842	19.3917	17.8421	UP
XLOC_010821	Zadh2	chr18	84088157	84097514	0.345467	0.487877	1.3337	1.09595	UP
XLOC_018171	Orai2	chr5	136147460	136170656	0.148838	0.151077	0.350687	0.52425	UP
XLOC_024867	Lonrf3	chrX	36328408	36366856	0.139452	0.145682	0.436468	0.398123	UP
XLOC_019299	Smyd1	chr6	71213939	71262281	0.970202	1.04624	3.15855	2.75219	UP
XLOC_024400	Skor1	chr9	63138163	63148961	0.376784	0.508615	1.38321	1.21779	UP
XLOC_011741	Fam189a2	chr19	23972749	24031019	0.261968	0.404952	0.828622	1.13607	UP
XLOC_020750	Tspan32	chr7	142982030	143019485	0.686866	0.580775	1.91	1.82803	UP
XLOC_021896	Tspan32	chr7	142982030	143019485	0.458706	0.433757	0.801916	0.822265	UP
XLOC_001801	Tle2	chr10	81575286	81590845	0.253157	0.171505	0.716617	0.536932	UP
XLOC_019537	Eno2	chr6	124760052	124769673	1.16717	0.625326	2.74007	2.55511	UP
XLOC_014010	Stmn3	chr2	181306458	181314500	13.2149	13.9409	42.8153	37.9292	UP
XLOC_025159	Armcx3	chrX	134756567	134761456	1.11149	1.00011	3.03768	3.24749	UP
XLOC_005991	Actn2	chr13	12269426	12340732	0.463199	0.25082	1.18141	0.949439	UP
XLOC_022863	Cilp2	chr8	69880365	69887392	0.844897	1.03862	3.16502	2.45792	UP
XLOC_014522	Gstm5	chr3	107877229	107898685	1.90199	2.37689	5.91871	6.98336	UP
XLOC_006818	Lrrc16b	chr14	55491092	55508264	0.227534	0.141085	0.521218	0.59551	UP
XLOC_009867	Pisd-ps2	chr17	3062487	3084183	3.05687	3.47438	10.9607	8.83941	UP
XLOC_008735	Pros1	chr16	62854333	62929340	3.97496	4.56566	12.8627	13.0322	UP
XLOC_021901	Cdkn1c	chr7	143458335	143461500	7.99242	8.89216	25.4373	25.7645	UP
XLOC_009035	Pla1a	chr16	38396116	38433145	0.935284	0.76821	2.4819	2.72666	UP
XLOC_021145	Scn1b	chr7	31116521	31126945	0.913044	0.766676	2.68468	2.47243	UP
XLOC_019671	Ldhb	chr6	142490248	142507957	33.784	33.7882	111.094	96.391	UP
XLOC_010918	Prob1	chr18	35650350	35655199	0.191802	0.247363	0.831289	0.523993	UP
XLOC_005049	Trib2	chr12	15791726	15816877	0.314947	0.422703	1.21987	1.05975	UP
XLOC_010540	Colec12	chr18	9707647	9877995	0.217742	0.239442	0.648398	0.768455	UP
XLOC_008799	Dopey2	chr16	93711906	93810769	3.82145	4.64941	7.14776	7.98389	UP
XLOC_009208	Dopey2	chr16	93711906	93810769	1.39875	1.50444	4.72527	4.30543	UP
XLOC_025269	Scml2	chrX	161162749	161258213	0.117815	0.164457	0.456672	0.425437	UP
XLOC_014847	Tmem144	chr3	79812567	79842942	1.22181	1.60947	3.98117	4.89864	UP
XLOC_003565	Sfi1	chr11	3123386	3193602	3.27011	3.49448	10.8991	10.3237	UP
XLOC_000910	Obsl1	chr1	75485824	75510354	3.76495	3.29884	11.694	10.6121	UP
XLOC_016341	Pcsk9	chr4	106442333	106464325	0.320555	0.314923	1.21915	0.792516	UP
XLOC_018577	Zfp775	chr6	48602015	48623227	1.75407	1.47302	3.07648	2.69258	UP
XLOC_019212	Zfp775	chr6	48602015	48623227	0.597093	0.491317	1.85787	1.59368	UP
XLOC_023690	Hexa	chr9	59539658	59565106	11.1952	11.5935	36.2588	36.0718	UP
XLOC_021699	Itpripl2	chr7	118485111	118491975	0.335955	0.219005	0.810257	0.963955	UP
XLOC_017744	Sorcs2	chr5	36017180	36398139	0.172744	0.0912547	0.52295	0.324368	UP
XLOC_015643	Dmrta2	chr4	109977794	109983684	0.356918	0.255471	0.873284	1.09521	UP
XLOC_021636	Cyb5r2	chr7	107595040	107758032	0.31184	0.353224	0.977769	1.17087	UP
XLOC_000592	Spta1	chr1	174172775	174248449	1.11107	1.4412	3.97801	4.27362	UP
XLOC_019190	Tcaf1	chr6	42669974	42710078	0.219101	0.137743	0.580033	0.576102	UP
XLOC_000700	Eya1	chr1	14168954	14310199	0.762866	0.786814	2.41084	2.6155	UP
XLOC_020291	AI854517	chr7	79500025	79534403	0.258244	0.340058	0.933783	1.01131	UP
XLOC_015506	Rgs3	chr4	62559846	62703019	0.854996	0.713051	2.43222	2.69214	UP
XLOC_000569	Kcnj10	chr1	172341209	172374085	0.206186	0.151593	0.629169	0.540859	UP
XLOC_019808	Zscan4f	chr7	11397914	11402318	0.285608	0.27413	0.935179	0.897812	UP
XLOC_018578	AI854703	chr6	48627290	48633688	0.260808	0.410333	1.05311	1.14918	UP
XLOC_013958	Bmp7	chr2	172868011	172940321	0.233111	0.338664	0.888224	0.990376	UP
XLOC_020950	Apoe	chr7	19696243	19701136	482.44	496.798	1631.99	1609.78	UP
XLOC_011324	Gna14	chr19	16435666	16610818	0.992907	1.26352	3.55136	3.93818	UP
XLOC_023617	Tmprss5	chr9	49102778	49117734	0.694029	0.601588	2.15625	2.14835	UP
XLOC_024316	Hspb2	chr9	50751071	50756635	2.58751	2.2177	8.65983	7.44654	UP
XLOC_019371	2310040G24Rik	chr6	86483352	86488372	2.43347	2.03946	7.62648	7.37771	UP
XLOC_004235	Krt19	chr11	100140810	100145919	0.411313	0.449306	1.8995	1.00437	UP
XLOC_020833	Clcn4-2	chr7	7282308	7300851	0.342343	0.147976	0.836475	0.823161	UP
XLOC_008249	Wnt7b	chr15	85535436	85593708	0.439475	0.455809	1.59888	1.44057	UP
XLOC_025666	Hdx	chrX	111575203	111697097	0.123628	0.220224	0.639539	0.542507	UP
XLOC_001575	Cd24a	chr10	43579168	43584265	10.2797	10.8798	34.9447	37.8284	UP
XLOC_010800	Zbtb7c	chr18	75820177	76148564	1.33844	1.17946	4.92587	3.7617	UP
XLOC_015797	Fabp3	chr4	130308419	130359977	70.8086	77.0238	245.734	269.151	UP
XLOC_003679	Fgf18	chr11	33116977	33147400	1.81254	2.03658	6.83609	6.58241	UP
XLOC_002940	Aldh3a1	chr11	61208741	61218416	1.20816	0.876901	3.9055	3.36933	UP
XLOC_018671	Foxi3	chr6	70956466	70962685	0.51241	0.456598	1.62079	1.76098	UP
XLOC_003528	Mir1932	chr11	119390061	119487473	1.52309	1.98492	6.09348	6.15319	UP
XLOC_003463	Gprc5c	chr11	114851531	114872617	0.395391	0.256729	1.27783	1.00196	UP
XLOC_012515	Pax6	chr2	105536079	105904564	0.465655	0.85857	2.28104	2.35875	UP
XLOC_020337	Ctsc	chr7	88278092	88310875	0.545245	0.719713	2.14459	2.28771	UP
XLOC_006852	Shisa2	chr14	59625280	59631664	2.63074	1.853	7.47814	8.37644	UP
XLOC_008669	Fstl1	chr16	37777054	37836516	4.95385	5.16895	17.1638	18.7407	UP
XLOC_023378	Gpr83	chr9	14859267	14870779	0.449279	0.395935	1.61859	1.39232	UP
XLOC_000435	Tnnt2	chr1	135836333	135852268	0.232139	0.0954621	0.656976	0.512028	UP
XLOC_019076	Ica1	chr6	8630526	8778484	1.71699	1.51427	5.56322	6.01751	UP
XLOC_021413	Ap3b2	chr7	81460398	81493925	0.413765	0.41282	1.52816	1.43679	UP
XLOC_015128	Snx7	chr3	117781496	117868936	1.06108	0.873578	3.53438	3.46218	UP
XLOC_015378	Rragd	chr4	32982997	33022180	2.09164	2.05838	7.22589	7.80339	UP
XLOC_012309	Sp5	chr2	70474922	70477726	1.30565	1.03278	4.15655	4.33091	UP
XLOC_010594	Lims2	chr18	31922308	31958619	0.832238	0.60268	2.87815	2.34868	UP
XLOC_013097	Uap1l1	chr2	25360851	25365677	9.07198	9.28337	33.8897	33.0173	UP
XLOC_018527	Ephb6	chr6	41605481	41620507	0.114963	0.127184	0.449154	0.435463	UP
XLOC_025207	Alg13	chrX	144317965	144374964	18.2571	22.3022	68.5741	79.9986	UP
XLOC_021525	Trim68	chr7	102677584	102687327	0.260998	0.423459	1.17924	1.33709	UP
XLOC_021895	Ascl2	chr7	142966821	142969264	0.4287	0.418757	1.26265	1.86934	UP
XLOC_011897	Hspa12a	chr19	58795750	58971421	0.32497	0.33265	1.11285	1.32013	UP
XLOC_020128	Klk13	chr7	43712566	43727738	0.623207	0.450034	1.80878	2.17839	UP
XLOC_015228	Nexn	chr3	152236983	152266320	0.187334	0.296016	0.845795	0.951903	UP
XLOC_011858	Psd	chr19	46304736	46327156	0.526378	0.319592	1.66235	1.49573	UP
XLOC_021427	Cemip	chr7	83932856	84086505	0.133678	0.237756	0.761699	0.645315	UP
XLOC_022652	Prr36	chr8	4209488	4217492	0.224088	0.173142	0.925125	0.580047	UP
XLOC_013823	Nol4l	chr2	153407460	153529971	0.572534	0.496759	2.13986	1.9495	UP
XLOC_011573	Tmem151a	chr19	5079336	5085477	0.511392	0.435511	1.6512	1.98764	UP
XLOC_017162	C530008M17Rik	chr5	76657731	76873554	0.2207	0.160521	0.718919	0.751832	UP
XLOC_018737	Tgfa	chr6	86195250	86275449	0.135032	0.116999	0.429832	0.543165	UP
XLOC_022257	Hapln4	chr8	70083480	70090862	0.470182	0.494721	1.89409	1.8571	UP
XLOC_020131	Klk10	chr7	43781053	43785410	2.11417	1.22696	5.78004	7.21736	UP
XLOC_020130	Klk11	chr7	43774612	43779262	0.787224	0.617589	3.19141	2.30694	UP
XLOC_019435	Frmd4b	chr6	97286866	97617657	0.1469	0.409776	1.14915	1.03426	UP
XLOC_014998	Plekho1	chr3	95988835	95996583	0.800002	0.875654	3.58127	3.00461	UP
XLOC_018194	Irs3	chr5	137643031	137645714	0.161033	0.270707	0.848732	0.851503	UP
XLOC_017059	Ablim2	chr5	35757879	35884979	0.226248	0.287736	1.23125	0.801062	UP
XLOC_014358	S100a13	chr3	90514434	90524581	1.73823	0.955836	5.07258	5.60363	UP
XLOC_020243	Ndn	chr7	62348276	62349927	1.73646	1.28212	5.82726	6.25322	UP
XLOC_002257	Gstt1	chr10	75783812	75798584	1.04693	1.38398	5.23268	4.53589	UP
XLOC_024198	Pknox2	chr9	36890978	37147322	0.188857	0.286757	0.949216	0.962706	UP
XLOC_004833	Gm2016	chr12	87874071	87877859	0.226198	0.181168	0.904074	0.746915	UP
XLOC_020651	Htra1	chr7	130936202	130985658	3.39921	3.18752	12.8018	13.9804	UP
XLOC_003412	Myl4	chr11	104550662	104587219	0.633168	0.525068	2.54539	2.18176	UP
XLOC_025407	Rhox9	chrX	37899096	37901770	0.4082	0.698823	2.07321	2.44691	UP
XLOC_018816	Bhlhe40	chr6	108577035	108666925	2.61712	2.7867	12.1646	10.0262	UP
XLOC_020241	Atp10a	chr7	58658201	58829426	0.324131	0.163302	1.135	0.882921	UP
XLOC_021713	Crym	chr7	120186383	120201988	0.362194	0.372205	1.69948	1.35482	UP
XLOC_014634	Clca4a	chr3	144947444	144975045	0.640467	0.606985	2.47225	2.71933	UP
XLOC_015211	Clca4a	chr3	144947444	144975045	0	0.0301044	0.0732403	0.0902872	UP
XLOC_006923	Gfra2	chr14	70890106	70979840	0.150068	0.104867	0.584798	0.478497	UP
XLOC_017356	Srrm4os	chr5	116438341	116591817	0.432139	0.571013	2.08056	2.15411	UP
XLOC_007573	March11	chr15	26308901	26409573	0.225236	0.227449	1.29783	0.680557	UP
XLOC_017060	Afap1	chr5	35893318	36003922	0.630486	0.548091	2.61395	2.57159	UP
XLOC_006874	Fam167a	chr14	63436393	63465502	0.242779	0.360448	1.47046	1.25537	UP
XLOC_008364	Fignl2	chr15	101050191	101080665	2.74784	2.22952	11.5928	11.0772	UP
XLOC_012166	Prrx2	chr2	30845366	30881247	1.02965	1.00412	4.52253	4.82427	UP
XLOC_017015	Trim54	chr5	31116611	31137688	1.03109	0.568888	3.5095	3.85208	UP
XLOC_005267	Gm5662	chr12	88270634	88274497	0.191261	0.145448	0.834134	0.722863	UP
XLOC_018702	Eva1a	chr6	82041627	82093099	0.284495	0.299967	1.47625	1.27529	UP
XLOC_022034	Gm5607	chr8	12385770	12436732	0.0956235	0.0798981	0.44846	0.405334	UP
XLOC_024371	Islr2	chr9	58196296	58208808	0.576506	0.654943	3.10888	2.97127	UP
XLOC_004777	Smoc1	chr12	81019437	81186414	0.505088	0.511158	2.45298	2.56469	UP
XLOC_013335	Neurod1	chr2	79452640	79456868	0.422555	0.517143	2.01953	2.72257	UP
XLOC_000771	Aff3	chr1	38175990	38627455	0.212486	0.190364	1.06535	1.0277	UP
XLOC_025206	A730046J19Rik	chrX	144153694	144166274	0.0598607	0.101755	0.47503	0.365602	UP
XLOC_011958	Fam107b	chr2	3713457	3782134	1.03445	1.25676	5.75563	6.33238	UP
XLOC_009152	Adamts1	chr16	85793827	85803115	0.179374	0.218653	0.993194	1.11718	UP
XLOC_002750	Nsg2	chr11	32000418	32059211	0.161484	0.243146	0.897406	1.25039	UP
XLOC_005786	Spata31d1b	chr13	59712264	59720975	0.416904	0.313571	2.0991	1.80932	UP
XLOC_022035	Sox1	chr8	12385770	12436732	1.31837	1.38485	6.91279	7.60868	UP
XLOC_022843	Tll1	chr8	64014040	64205993	0.127964	0.215475	0.772803	1.12192	UP
XLOC_001351	G0s2	chr1	193272159	193273773	0.432419	0.446852	2.59736	2.31463	UP
XLOC_006996	LOC105245869	chr14	118233233	118261199	0.126592	0.186901	0.934525	0.883886	UP
XLOC_011499	Rbm20	chr19	53677305	53867080	0.107538	0.132079	0.72319	0.696467	UP
XLOC_021796	Fgfr2	chr7	130162450	130266808	0.184176	0.172362	1.06869	1.08211	UP
XLOC_017707	Slc30a3	chr5	31086058	31093527	0.276493	0.309728	2.40325	1.22088	UP
XLOC_005779	Tgfbi	chr13	56609602	56639339	1.11414	1.14518	7.5845	6.47497	UP
XLOC_019807	Zscan4c	chr7	11005744	11010547	0.152614	0.0884284	0.872695	0.659869	UP
XLOC_025122	Sh3bgrl	chrX	109018901	109162470	1.13923	0.996982	6.69274	7.02386	UP
XLOC_024894	Rhox5	chrX	37754607	37808878	2.47726	3.32773	19.9506	17.5964	UP
XLOC_016191	AI427809	chr4	53261355	53338126	0.202643	0.152539	1.0892	1.25881	UP
XLOC_011247	Rab3il1	chr19	10017894	10035586	0.605586	0.677421	4.86404	3.70129	UP
XLOC_022729	Gm15816	chr8	22974835	23150497	0.351796	0.213476	1.83608	1.95933	UP
XLOC_014674	Wls	chr3	159839694	159935175	0.330187	0.251499	2.00712	1.96015	UP
XLOC_014781	Frem2	chr3	53513937	53657367	0.13298	0.160888	1.06255	0.989795	UP
XLOC_021577	Trim12c	chr7	104338753	104353363	0.142698	0.213553	0.99572	1.50589	UP
XLOC_022556	Cdh13	chr8	118283754	119323448	0.0537071	0.0894704	0.524912	0.489497	UP
XLOC_000581	Aim2	chr1	173420603	173466319	1.20719	1.55266	8.97138	10.9261	UP
XLOC_001248	Atp1a4	chr1	172223354	172258424	0.139367	0.0799511	0.890329	0.694742	UP
XLOC_004890	Bdkrb2	chr12	105563171	105595064	0.0898562	0.0865757	0.708665	0.59462	UP
XLOC_016382	Dmbx1	chr4	115913922	115964370	0.41228	0.413602	3.34205	2.94815	UP
XLOC_021891	Igf2	chr7	142650767	142670356	0.255289	0.226718	1.60883	2.1281	UP
XLOC_012613	B2m	chr2	122120107	122186189	5.31791	4.09263	37.0342	39.4656	UP
XLOC_025063	Stard8	chrX	99042580	99074728	0.458556	0.386381	3.68381	3.41941	UP
XLOC_010038	Grm4	chr17	27422387	27503533	0.0725311	0.0425724	0.528034	0.457776	UP
XLOC_017891	Adamts3	chr5	89673840	89883334	0.0535905	0.076823	0.540586	0.602151	UP
XLOC_010368	2410021H03Rik	chr17	69156760	69289987	0.160105	0.256695	2.14098	1.69603	UP
XLOC_018721	Vax2	chr6	83692805	83738304	0.592229	0.782943	7.0107	6.31754	UP
XLOC_022470	Hsf4	chr8	105269800	105275845	0.0592536	0.0565525	0.771055	0.411092	UP
XLOC_010859	Zfp521	chr18	13687013	13972733	0.132961	0.0495779	1.09214	1.09558	UP
XLOC_020247	Trpm1	chr7	64153834	64269759	0.0475558	0.0969485	1.15925	0.721734	UP
XLOC_013671	Patl2	chr2	122120107	122186189	1.27595	0.874761	16.7411	15.6715	UP
XLOC_025719	Tex13	chrX	140808306	140813433	0.0269773	0.0898132	1.24342	0.815013	UP
XLOC_005812	Gm10324	chr13	65930948	66305228	1.79244	1.30378	1.51807	56.7731	UP
XLOC_005813	Gm10324	chr13	65930948	66305228	18.4776	23.8439	14.851	16.9476	UP
XLOC_018476	Mest	chr6	30733505	30896794	1.55366	1.91764	42.9878	44.4179	UP
XLOC_025856	Eif2s3y	chrY	1008506	1028958	1.40346	2.04087	44.5814	53.1087	UP
XLOC_025854	Uba1y	chrY	818642	844224	0.021017	0.0323719	1.02816	0.845772	UP
XLOC_025899	Uty	chrY	1096900	1245756	0.109918	0.0965466	3.57846	5.15882	UP
XLOC_025900	Ddx3y	chrY	1260714	1286620	0.235222	0.403409	16.394	20.5784	UP
